# Supplementary material
Source: publisher site journal article supplement (https://www.dovepress.com/article/210060)
Supplement: Supplementary file 1 [file get_supplementary_file.php]

# Supplementary Data

Bittker SS, Bell KR. Potential Risk Factors for Celiac Disease in Childhood: A Case-Control Epidemiological Survey. *Clinical and Experimental Gastroenterology*. 2019; 12.

## Contents

- Table S1 Groups Where Survey Was Highlighted
- Table S2 Encoding of Exposure Variables
- Table S3 Encoding of Demographic Variables
- Table S4 Demographics for Expanded Sample Including CD Parents
- Table S5 Categorical Variables and ORs for Expanded Sample Including CD Parents
- Table S6 ORs and aORs for Expanded Sample Including CD Parents
- Figure S1 Flow Chart for Participant Inclusion in Expanded Sample Including CD Parents

## Table S1 Groups Where Survey Was Highlighted

| Name of group                                              | Type                  | Primary media |
|------------------------------------------------------------|-----------------------|---------------|
| About Celiac Disease Hawaii                                | Celiac                | Facebook      |
| Arizona East Valley Celiac Support Group                   | Celiac                | Facebook      |
| Baltimore Gluten Free                                      | Gluten free           | Facebook      |
| Beyond Celiac                                              | National organization | Facebook      |
| Celiac / NCGS Kids KC                                      | Celiac kids           | Facebook      |
| Celiac and Me - Living Gluten Free Due to Celiac           | Celiac                | Facebook      |
| Celiac and the Beast-ies Celiac Support Group              | Celiac                | Facebook      |
| Celiac Awareness                                           | Celiac                | Facebook      |
| Celiac children; Healthy Gluten Free Living                | Celiac kids           | Facebook      |
| Celiac Disease Support for NY NJ CT PA                     | Celiac                | Facebook      |
| Celiac Disease Support Group                               | Celiac                | Facebook      |
| Celiac Disease, Gluten Free Group - Recipes, Talk and More | Celiac                | Facebook      |
| Celiac Disease-Gluten Free Support Group                   | Celiac                | Facebook      |
| Celiac Families Cedar Park TX                              | Celiac kids           | Facebook      |
| Celiac in California                                       | Celiac                | Facebook      |
| Celiac Kids Meal Planning                                  | Celiac kids           | Facebook      |
| Celiac Kids of Grand Rapids, MI                            | Celiac kids           | Facebook      |
| Celiac Moms & Dads, USA and Canada                         | Celiac                | Facebook      |

|                                                   |                        |          |
|---------------------------------------------------|------------------------|----------|
| Celiac Parents and Parents of Celiacs             | Celiac kids            | Facebook |
| Celiac Project                                    | Celiac                 | Facebook |
| Celiac Recipe Group                               | Celiac                 | Facebook |
| Celiac Sprue Association of Tulsa                 | Celiac                 | Facebook |
| Celiac Support and Awareness-WI                   | Celiac                 | Facebook |
| Celiac Support Group for Nebraska and Iowa        | Celiac                 | Facebook |
| Celiac Support Group of Madison County            | Celiac                 | Facebook |
| Celiacs of Philadelphia PA and Tri-State Area     | Celiac                 | Facebook |
| Celiac-Safe Eats – Seattle                        | Celiac                 | Facebook |
| Center for Celiac Research and Treatment          | Celiac research center | Facebook |
| CNY Celiac Support                                | Celiac                 | Website  |
| Coeliac Disease for Beginners                     | Celiac                 | Facebook |
| Cycle - Celiac Youth of Carolinas Life Enrichment | Celiac kids            | Facebook |
| Delaware Celiac - G Free                          | Celiac                 | Facebook |
| Denver Celiac                                     | Celiac                 | Facebook |
| Diary of a Celiac Kid                             | Celiac kids            | Facebook |
| Downriver Gluten Free Kids                        | Gluten free kids       | Facebook |
| East Valley Celiac Parents                        | Celiac kids            | Facebook |
| Eating Gluten Free in Dallas                      | Gluten free            | Facebook |
| Families of Children with Celiac Disease          | Celiac kids            | Facebook |
| Families with Celiac Disease in the Hudson Valley | Celiac                 | Facebook |
| Free From Gluten                                  | Gluten free            | Facebook |
| Gluten Free / Celiac Disease                      | Celiac                 | Facebook |
| Gluten Free / Celiac Mom's on the South Shore     | Gluten free            | Facebook |
| Gluten Free and Me                                | Gluten free            | Facebook |
| Gluten Free Baton Rouge                           | Gluten free            | Facebook |
| Gluten Free Boston                                | Gluten free            | Facebook |
| Gluten Free Charlotte                             | Gluten free            | Facebook |
| Gluten Free Des Moines                            | Gluten free            | Facebook |
| Gluten Free Disney                                | Gluten free            | Facebook |
| Gluten Free Disney!                               | Gluten free            | Facebook |
| Gluten Free Families                              | Gluten free            | Facebook |
| Gluten Free Families of Massachusetts             | Gluten free            | Facebook |
| Gluten Free Groove                                | Gluten free            | Facebook |
| Gluten Free in North Phoenix                      | Gluten free            | Facebook |
| Gluten Free in the East Valley                    | Gluten free            | Facebook |
| Gluten Free in Utah County                        | Gluten free            | Facebook |
| Gluten free is for you and me                     | Gluten free            | Facebook |
| Gluten Free Kids                                  | Gluten free kids       | Facebook |
| Gluten Free Kids on Long Island                   | Gluten free kids       | Facebook |
| Gluten Free Living and Recipe Share               | Gluten free            | Facebook |
| Gluten Free Low Sugar Living                      | Gluten free            | Facebook |
| Gluten Free Massachusetts                         | Gluten free            | Facebook |

|                                                     |                       |                       |
|-----------------------------------------------------|-----------------------|-----------------------|
| Gluten Free New York City                           | Gluten free           | Facebook              |
| Gluten Free on Long Island                          | Gluten free           | Facebook              |
| Gluten Free People Of Bergen County                 | Gluten free           | Facebook              |
| Gluten Free Planet                                  | Gluten free           | Facebook              |
| Gluten Free Recipes / Gastronomic Rebel             | Gluten free           | Facebook              |
| Gluten Free Respect                                 | Gluten free           | Facebook              |
| Gluten Free Seattle                                 | Gluten free           | Facebook              |
| Gluten Free The Desi Way                            | Gluten free           | Facebook              |
| Gluten Free Utah                                    | Gluten free           | Facebook              |
| Gluten Intolerance Group of Central Arkansas        | Gluten free           | Facebook              |
| Gluten-Free Around DC                               | Gluten free           | Facebook              |
| Gluten-free Disney Travel                           | Gluten free           | Facebook              |
| Gluten-Free Families of Richmond, VA                | Gluten free           | Facebook              |
| Gluten-Free Foodies of The Woodlands, Conroe...     | Gluten free           | Facebook              |
| Gluten-Free Seattle                                 | Gluten free           | Facebook              |
| Greater Grand Rapids Gluten-free Lifestyle Support  | Gluten free           | Facebook              |
| Grub Without Gluten (and Other Matters Gluten Free) | Gluten free           | Facebook              |
| Highlands Ranch Celiac                              | Celiac                | Facebook              |
| Honestly Gluten Free                                | Gluten free           | Facebook              |
| I Love Gluten Free                                  | Gluten free           | Facebook              |
| Kids Living Gluten Free in Oceanside NY             | Gluten free kids      | Facebook              |
| Kids with Celiac Disease                            | Celiac kids           | Facebook              |
| Kids with Celiac Disease in the Suburbs of Chicago  | Celiac kids           | Facebook              |
| Kids with Celiac Support Group                      | Celiac kids           | Facebook              |
| Kosher Me & Gluten Free                             | Gluten free           | Facebook              |
| Lancaster Area Celiac Support Group                 | Celiac                | Facebook              |
| Living Gluten Free in San Diego                     | Gluten free           | Facebook              |
| Lunchbox Gluten Free and More                       | Gluten free kids      | Facebook              |
| Madison Area Gluten Intolerance Chapter             | Gluten free           | Facebook              |
| Menifee Child / Teen Celiac Disease Support Group   | Celiac kids           | Facebook              |
| Menu Planning for Gluten Free People!               | Gluten free           | Facebook              |
| Moms of celiac children in Wayne County             | Celiac kids           | Facebook              |
| My Celiac kids                                      | Celiac                | Facebook              |
| National Celiac Association                         | National organization | Electronic newsletter |
| Pacific Northwest Celiac kids                       | Celiac kids           | Facebook              |
| Parents of Gluten Free and Celiac Kids              | Celiac kids           | Facebook              |
| Parents of Gluten Free Kids – Milwaukee             | Gluten free kids      | Facebook              |
| Pikes Peak Celiac Group                             | Celiac                | Facebook              |
| Raising Our Celiac Kids Long Island                 | Celiac kids           | Facebook              |
| Rockin' Celiac Disease (Child's Support Group)      | Celiac kids           | Facebook              |
| San Diego Gluten-Free Kids                          | Gluten free kids      | Facebook              |
| Southern Utah Celiac Support Group                  | Celiac                | Facebook              |
| St Louis Celiac Support Group for Kids              | Celiac kids           | Facebook              |

|                                                       |             |          |
|-------------------------------------------------------|-------------|----------|
| Stay Gluten Free Community                            | Gluten free | Facebook |
| Support Celiac Disease Awareness & Become Gluten Free | Celiac      | Facebook |
| The Gluten Free Blogger Group                         | Gluten free | Facebook |
| The Gluten Free Life                                  | Gluten free | Facebook |
| Utah Celiacs / Gluten Free                            | Celiac      | Facebook |
| WNY Gluten Free Diet Support Group                    | Gluten free | Facebook |
| Zen Lion Gluten Free                                  | Gluten free | Facebook |

**Table S2 Encoding of Exposure Variables**

| Variable      | Answer                                              | Value |
|---------------|-----------------------------------------------------|-------|
| Celiac        | Yes                                                 | 1     |
|               | No                                                  | 0     |
| Ear infection | None                                                | 0     |
|               | 1                                                   | 1     |
|               | 2 to 3                                              | 2     |
|               | 4 or more, or persistent ear infections             | 4     |
|               | I'm not sure                                        | NA    |
| Antibiotic    | None                                                | 0     |
|               | 1                                                   | 1     |
|               | 2 to 3                                              | 2     |
|               | 4 to 7                                              | 4     |
|               | 8 or more                                           | 8     |
|               | I'm not sure                                        | NA    |
| Breastfeed    | This child was never breastfed                      | 0     |
|               | 3 months or less                                    | 3     |
|               | More than 3 months and up to 6 months               | 6     |
|               | More than 6 months and up to 12 months              | 12    |
|               | More than 12 months                                 | 18    |
|               | I'm not sure                                        | NA    |
| Vit D drop    | This child never received vitamin D drops as a baby | 0     |
|               | 3 months or less                                    | 0     |
|               | More than 3 months and up to 6 months               | 1     |
|               | More than 6 months and up to 12 months              | 1     |
|               | More than 12 months                                 | 1     |
|               | I'm not sure                                        | NA    |
| Age gluten    | This child has never had gluten                     | 0     |
|               | 3 months or younger                                 | 3     |
|               | Older than 3 months and up to 6 months              | 6     |
|               | Older than 6 months and up to 12 months             | 12    |
|               | Older than 12 months                                | 18    |
|               | I'm not sure                                        | NA    |

|                  |                                                              |     |
|------------------|--------------------------------------------------------------|-----|
| Skim milk        | This child did not consume cow's milk during this time       | 0   |
|                  | Skim milk                                                    | 1   |
|                  | Low fat milk                                                 | 0   |
|                  | 2% milk                                                      | 0   |
|                  | Whole milk                                                   | 0   |
|                  | I'm not sure                                                 | NA  |
| Milk quantity    | This child did not consume cow's milk during this time       | 0   |
|                  | 1/2 cup or less                                              | 0.5 |
|                  | More than 1/2 cup and up to 1 cup                            | 1   |
|                  | More than 1 cup and up to 2 cups                             | 2   |
|                  | More than 2 cups and up to 3 cups                            | 3   |
|                  | More than 3 cups                                             | 4   |
| Vit D supplement | No                                                           | 0   |
|                  | Yes, occasionally or only for part of that year              | 1   |
|                  | Yes, regularly or fairly regularly for that entire year      | 2   |
|                  | I'm not sure                                                 | NA  |
| RO water         | Any other type of bottled water                              | 0   |
|                  | Distilled or reverse-osmosis bottled water                   | 1   |
|                  | Distilled or reverse-osmosis water from a home unit          | 1   |
|                  | Filtered water from a home unit or a Brita-like water filter | 0   |
|                  | Plain tap water (unfiltered)                                 | 0   |
|                  | Softened water from a home unit                              | 0   |
|                  | Well water                                                   | 0   |
|                  | Other                                                        | 0   |
|                  | I'm not sure                                                 | NA  |

**Abbreviations:** Vit, vitamin; RO, reverse osmosis.

**Table S3 Encoding of Demographic Variables**

| Variable  | Answer                           | Value |
|-----------|----------------------------------|-------|
| Age child | Scaled numeric variable          | -     |
| Education | Grade school or some high school | 0     |
|           | High school                      | 0     |
|           | Some college                     | 1     |
|           | Bachelor's or associate's degree | 2     |
|           | Graduate or professional degree  | 3     |
| Ethnicity | White (non-Hispanic)             | 0     |
|           | African American / Black         | 1     |
|           | Asian                            | 1     |
|           | Hawaiian / Pacific Islander      | 1     |

|              |                         |   |
|--------------|-------------------------|---|
|              | Hispanic / Latino       | 1 |
|              | Native American         | 1 |
|              | Multiethnic             | 1 |
|              | Other                   | 1 |
| Maternal age | Scaled numeric variable | - |
| Northeast    | Midwest                 | 0 |
|              | Northeast               | 1 |
|              | Southeast               | 0 |
|              | Southwest               | 0 |
|              | West                    | 0 |
| Southeast    | Midwest                 | 0 |
|              | Northeast               | 0 |
|              | Southeast               | 1 |
|              | Southwest               | 0 |
|              | West                    | 0 |
| Relationship | Biological father       | 1 |
|              | Biological mother       | 0 |
| Sex          | Male                    | 1 |
|              | Female                  | 0 |

**Table S4 Demographics for Expanded Sample Including CD Parents**

| Variable                                  | Cases       | Controls   |
|-------------------------------------------|-------------|------------|
| n                                         | 457         | 378        |
| Age of child (mean, SD)                   | 8.6 (2.6)   | 6.1 (2.8)  |
| Age of diagnosis (mean, SD)               | 6.2 (2.4)   | -          |
| CD Parent                                 | 124 (27.1)  | 137 (36.2) |
| Sex of child - male (n , %)               | 170 (37.2)  | 186 (49.2) |
| Maternal age at birth of child (mean, SD) | 30.5 (31.2) | 4.6 (4.6)  |
| Ethnicity of child (n, %)                 |             |            |
| White (non-Hispanic)                      | 413 (90.4)  | 332 (87.8) |
| African American / Black                  | 1 (0.2)     | -          |
| Asian                                     | -           | 3 (0.8)    |
| Hawaiian / Pacific Islander               | -           | 1 (0.3)    |
| Hispanic / Latino                         | 7 (1.5)     | 10 (2.6)   |
| Native American                           | 4 (0.9)     | -          |
| Multiethnic                               | 21 (4.6)    | 21 (5.6)   |
| Other                                     | 11 (2.4)    | 11 (2.9)   |
| Regions of the USA (n, %)                 |             |            |
| Midwest                                   | 134 (29.3)  | 101 (26.7) |
| Northeast                                 | 120 (26.3)  | 98 (25.9)  |
| Southeast                                 | 67 (14.7)   | 70 (18.5)  |

|                                                |            |            |
|------------------------------------------------|------------|------------|
| Southwest                                      | 41 (9)     | 33 (8.7)   |
| West                                           | 95 (20.8)  | 76 (20.1)  |
| Maternal education (n, %)                      |            |            |
| Grade school or some high school               | 2 (0.4)    | 3 (0.8)    |
| High school                                    | 26 (5.7)   | 21 (5.6)   |
| Some college                                   | 66 (14.4)  | 60 (15.9)  |
| Bachelor's or associate's degree               | 215 (47)   | 172 (45.5) |
| Graduate or professional degree                | 148 (32.4) | 122 (32.3) |
| Relationship to child (n, %)                   |            |            |
| Biological mother                              | 447 (97.8) | 374 (98.9) |
| Biological father                              | 10 (2.2)   | 4 (1.1)    |
| Other conditions in child (n, %)               |            |            |
| None                                           | 280 (61.3) | 277 (73.3) |
| Attention deficit / hyperactivity disorder     | 62 (13.6)  | 36 (9.5)   |
| Autism spectrum disorder                       | 9 (2)      | 20 (5.3)   |
| Down syndrome                                  | 2 (0.4)    | 1 (0.3)    |
| Lactose intolerance                            | 55 (12)    | 21 (5.6)   |
| Peanut allergy                                 | 18 (3.9)   | 13 (3.4)   |
| Other food allergy                             | 36 (7.9)   | 23 (6.1)   |
| Other                                          | 93 (20.4)  | 39 (10.3)  |
| How did (respondent) hear about survey? (n, %) |            |            |
| Beyond Celiac                                  | 92 (20.1)  | 33 (8.7)   |
| National Celiac Association or Chapter         | 17 (3.7)   | 7 (1.9)    |
| Other CD or gluten related group               | 248 (54.3) | 106 (28)   |
| General interest parents group                 | 53 (11.6)  | 59 (15.6)  |
| Advertisement                                  | 2 (0.4)    | 48 (12.7)  |
| Friend                                         | 31 (6.8)   | 110 (29.1) |
| Other                                          | 14 (3.1)   | 15 (4)     |
| Respondent provided an email address (n, %)    | 435 (95.2) | 339 (89.7) |

**Abbreviations:** CD, celiac disease; SD, standard deviation; %, percentage of cases or controls.

**Table S5 Categorical Variables and ORs for Expanded Sample Including CD Parents**

| Question <sup>a</sup> /variable               | Cases<br>n (%) | Controls<br>n (%) | OR    | 95% CI        | p-value |
|-----------------------------------------------|----------------|-------------------|-------|---------------|---------|
| Ear infections up to second birthday?         |                |                   |       |               |         |
| None                                          | 141 (30.9)     | 126 (33.3)        | 0.930 | 0.693 - 1.249 | 0.630   |
| 1                                             | 78 (17.1)      | 86 (22.8)         | 0.722 | 0.512 - 1.019 | 0.063   |
| 2-3                                           | 101 (22.1)     | 88 (23.3)         | 0.970 | 0.700 - 1.346 | 0.857   |
| >4 or persistent                              | 111 (24.3)     | 67 (17.7)         | 1.553 | 1.104 - 2.186 | 0.011*  |
| I'm not sure                                  | 26 (5.7)       | 11 (2.9)          | -     | -             | -       |
| Courses of antibiotics up to second birthday? |                |                   |       |               |         |

|                                               |            |            |       |               |         |
|-----------------------------------------------|------------|------------|-------|---------------|---------|
| None                                          | 70 (15.3)  | 74 (19.6)  | 0.817 | 0.568 - 1.175 | 0.276   |
| 1                                             | 68 (14.9)  | 81 (21.4)  | 0.703 | 0.491 - 1.008 | 0.054   |
| 2-3                                           | 117 (25.6) | 120 (31.7) | 0.824 | 0.606 - 1.120 | 0.216   |
| 4-7                                           | 95 (20.8)  | 67 (17.7)  | 1.358 | 0.944 - 1.929 | 0.087   |
| 8+                                            | 51 (11.2)  | 18 (4.8)   | 2.769 | 1.585 - 4.835 | <0.001* |
| I'm not sure                                  | 56 (12.3)  | 18 (4.8)   | -     | -             | -       |
| Duration of breastfeeding?                    |            |            |       |               |         |
| Never breastfed                               | 79 (17.3)  | 60 (15.9)  | 1.108 | 0.767 - 1.599 | 0.585   |
| 3 months or less                              | 80 (17.5)  | 69 (18.3)  | 0.950 | 0.666 - 1.356 | 0.779   |
| >3 months and up to 6 months                  | 57 (12.5)  | 43 (11.4)  | 1.110 | 0.728 - 1.692 | 0.627   |
| >6 months and up to 12 months                 | 104 (22.8) | 72 (19)    | 1.252 | 0.894 - 1.754 | 0.191   |
| >12 months                                    | 137 (30)   | 134 (35.4) | 0.780 | 0.583 - 1.042 | 0.093   |
| Duration of vitamin D drops as a baby?        |            |            |       |               |         |
| No vitamin D drops                            | 277 (60.6) | 231 (61.1) | 1.036 | 0.772 - 1.391 | 0.814   |
| 3 months or less                              | 55 (12)    | 63 (16.7)  | 0.698 | 0.471 - 1.034 | 0.072   |
| >3 months and up to 6 months                  | 42 (9.2)   | 22 (5.8)   | 1.679 | 0.982 - 2.871 | 0.056   |
| >6 months and up to 12 months                 | 39 (8.5)   | 30 (7.9)   | 1.108 | 0.673 - 1.823 | 0.688   |
| >12 months                                    | 11 (2.4)   | 12 (3.2)   | 0.762 | 0.332 - 1.749 | 0.521   |
| I'm not sure                                  | 33 (7.2)   | 20 (5.3)   | -     | -             | -       |
| Supplemental vitamin D between 2-3?           |            |            |       |               |         |
| No                                            | 308 (67.4) | 267 (70.6) | 1.015 | 0.744 - 1.387 | 0.923   |
| Occasionally or only part of year             | 58 (12.7)  | 45 (11.9)  | 1.141 | 0.752 - 1.732 | 0.534   |
| Regularly or fairly regularly for entire year | 59 (12.9)  | 58 (15.3)  | 0.867 | 0.586 - 1.284 | 0.477   |
| I'm not sure                                  | 32 (7)     | 8 (2.1)    | -     | -             | -       |
| Age at which gluten introduced?               |            |            |       |               |         |
| 3 months or younger                           | 11 (2.4)   | 10 (2.6)   | 0.905 | 0.380 - 2.154 | 0.821   |
| >3 months and up to 6 months                  | 157 (34.4) | 119 (31.5) | 1.135 | 0.848 - 1.519 | 0.396   |
| >6 months and up to 12 months                 | 246 (53.8) | 205 (54.2) | 0.976 | 0.741 - 1.287 | 0.866   |
| >12 months                                    | 36 (7.9)   | 37 (9.8)   | 0.785 | 0.485 - 1.270 | 0.323   |
| I'm not sure                                  | 7 (1.5)    | 7 (1.9)    | -     | -             | -       |
| Type of liquid cow's milk between 2-3?        |            |            |       |               |         |
| No cow's milk at this time                    | 45 (9.8)   | 40 (10.6)  | 0.933 | 0.595 - 1.463 | 0.764   |
| Skim milk                                     | 33 (7.2)   | 12 (3.2)   | 2.400 | 1.222 - 4.717 | 0.009*  |
| Low fat milk                                  | 38 (8.3)   | 31 (8.2)   | 1.026 | 0.625 - 1.685 | 0.918   |
| 2% milk                                       | 132 (28.9) | 106 (28)   | 1.057 | 0.781 - 1.431 | 0.718   |
| Whole milk                                    | 202 (44.2) | 187 (49.5) | 0.823 | 0.626 - 1.083 | 0.165   |
| I'm not sure                                  | 7 (1.5)    | 2 (0.5)    | -     | -             | -       |
| Daily quantity of milk between 2-3?           |            |            |       |               |         |
| No cow's milk at this time                    | 44 (9.6)   | 39 (10.3)  | 0.973 | 0.617 - 1.535 | 0.908   |
| 1/2 cup or less                               | 55 (12)    | 41 (10.8)  | 1.185 | 0.770 - 1.823 | 0.440   |
| > 1/2 cup and up to 1 cup                     | 65 (14.2)  | 52 (13.8)  | 1.096 | 0.739 - 1.627 | 0.648   |
| > 1 cup and up to 2 cups                      | 124 (27.1) | 109 (28.8) | 0.978 | 0.720 - 1.329 | 0.886   |
| > 2 cups and up to 3 cups                     | 102 (22.3) | 90 (23.8)  | 0.974 | 0.703 - 1.350 | 0.876   |



|                                      |            |            |       |               |       |
|--------------------------------------|------------|------------|-------|---------------|-------|
| > 3 cups                             | 33 (7.2)   | 35 (9.3)   | 0.800 | 0.487 - 1.317 | 0.379 |
| I'm not sure                         | 34 (7.4)   | 12 (3.2)   | -     | -             | -     |
| Water type at age 2?                 |            |            |       |               |       |
| Distilled or RO bottled water        | 11 (2.4)   | 12 (3.2)   | 0.764 | 0.333 - 1.752 | 0.524 |
| Any other type of bottled water      | 41 (9)     | 42 (11.1)  | 0.802 | 0.509 - 1.262 | 0.339 |
| Distilled or RO water from home unit | 15 (3.3)   | 19 (5)     | 0.609 | 0.305 - 1.217 | 0.157 |
| Softened water from home unit        | 13 (2.8)   | 7 (1.9)    | 1.576 | 0.622 - 3.991 | 0.333 |
| Filtered water from home unit        | 176 (38.5) | 140 (37)   | 1.091 | 0.823 - 1.447 | 0.543 |
| Plain tap water (unfiltered)         | 159 (34.8) | 124 (32.8) | 1.119 | 0.838 - 1.494 | 0.447 |
| Well water                           | 26 (5.7)   | 27 (7.1)   | 0.797 | 0.457 - 1.391 | 0.423 |
| Other                                | 8 (1.8)    | 6 (1.6)    | 1.122 | 0.386 - 3.262 | 0.833 |
| I'm not sure                         | 8 (1.8)    | 1 (0.3)    | -     | -             | -     |

**Notes:** <sup>a</sup> Questions and answers in this table were edited for brevity; \* for p values < .05.

**Abbreviations:** CD, celiac disease; OR, Wald odds ratio; 95% CI, 95% Wald confidence interval, RO, reverse osmosis.

**Table S6 ORs and aORs for Expanded Sample Including CD Parents**

|                                | OR    | Unadjusted    |         | aOR   | Adjusted <sup>a</sup> |         |
|--------------------------------|-------|---------------|---------|-------|-----------------------|---------|
|                                |       | 95% CI        | p-value |       | 95% CI                | p-value |
| Ear infection (#)              | 1.111 | 1.012 - 1.221 | 0.027*  | 1.069 | 0.964 - 1.186         | 0.208   |
| Antibiotic (courses)           | 1.156 | 1.081 - 1.239 | <0.001* | 1.105 | 1.026 - 1.193         | 0.009*  |
| Breastfeeding (months)         | 0.990 | 0.971 - 1.009 | 0.307   | 1.003 | 0.982 - 1.025         | 0.759   |
| Vit D drop > 3 months (binary) | 1.273 | 0.894 - 1.822 | 0.183   | 1.630 | 1.100 - 2.432         | 0.016*  |
| Vit D supplement (trinary)     | 0.962 | 0.796 - 1.163 | 0.687   | 1.021 | 0.827 - 1.261         | 0.848   |
| Age gluten (months)            | 0.982 | 0.947 - 1.018 | 0.321   | 0.996 | 0.957 - 1.037         | 0.856   |
| Skim milk (binary)             | 2.400 | 1.255 - 4.905 | 0.011*  | 2.189 | 1.084 - 4.686         | 0.035*  |
| Milk quantity (cups / day)     | 0.949 | 0.844 - 1.068 | 0.387   | 0.885 | 0.776 - 1.009         | 0.068   |
| RO water (binary)              | 0.686 | 0.397 - 1.176 | 0.172   | 0.577 | 0.314 - 1.050         | 0.073   |

**Notes:** <sup>a</sup> Covariates for the adjusted odds ratios are: age of the child, ethnicity of child, maternal education, and maternal age at birth of the child; \* for p values < .05.

**Abbreviations:** CD, celiac disease; OR, odds ratio; aOR, adjusted odds ratio; 95% CI, 95% confidence interval, Vit, vitamin; RO, reverse osmosis.

**Figure S1 Flow Chart for Participant Inclusion in Expanded Sample Including CD Parents**

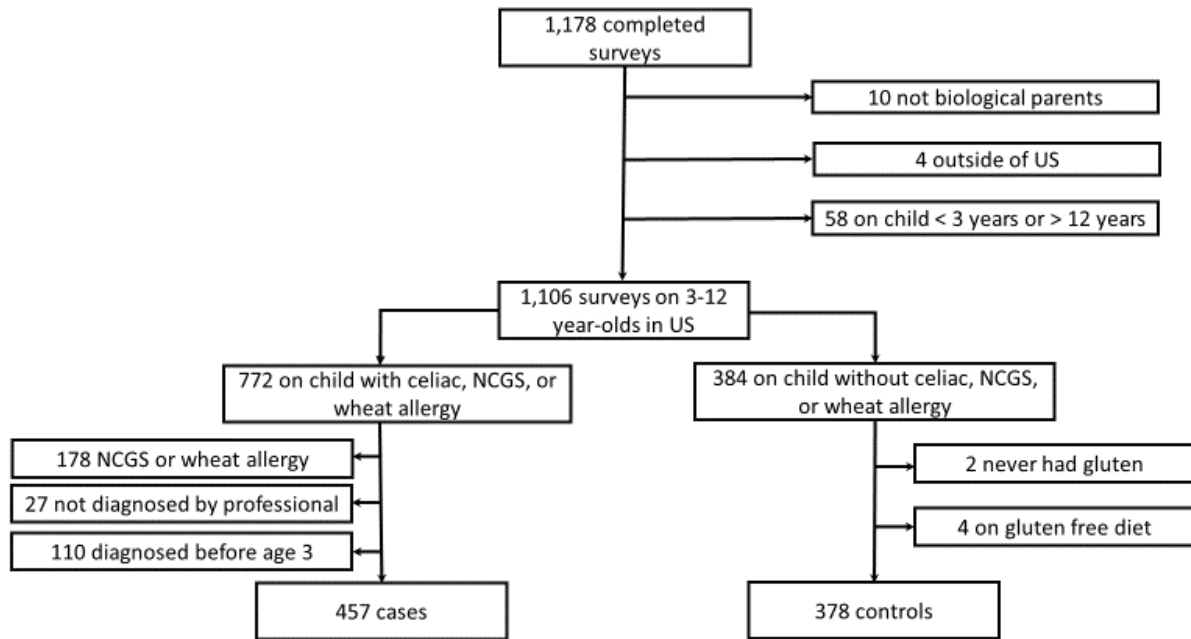

**Abbreviations:** CD, celiac disease, NCGS, non-celiac gluten sensitivity; US, United States.
